# Supplementary material
Source: MDPI journal article supplement (https://www.mdpi.com/search?q=ijerph-17-00600)
Supplement: s001 [file ijerph-17-00600-s001.pdf]

**Table S1.** Participants characteristics, stratified to domains of loneliness.

| Items                   | Emotional loneliness |                 |                | Social loneliness |                 |                |
|-------------------------|----------------------|-----------------|----------------|-------------------|-----------------|----------------|
|                         | Yes<br>(N=627)       | No<br>(N=1542)  | <i>P-value</i> | Yes<br>(N=575)    | No<br>(N=1594)  | <i>P-value</i> |
|                         | Mean±SD<br>N(%)      | Mean±SD<br>N(%) |                | Mean±SD<br>N(%)   | Mean±SD<br>N(%) |                |
| Age                     | 80.1±5.8             | 79.5±5.5        | 0.021*         | 80.4±5.3          | 79.3±5.7        | <0.001***      |
| Sex                     |                      |                 | <0.001***      |                   |                 | 0.137*         |
| Female                  | 443(33,7)            | 870(66,3)       |                | 363(27,6)         | 950(72,4)       |                |
| Male                    | 184(21,5)            | 672(78,5)       |                | 212(24,8)         | 644(75,2)       |                |
| Country                 |                      |                 | <0.001***      |                   |                 | <0.001***      |
| The United Kingdom      | 91(17,2)             | 437(82,8)       |                | 71(13,4)          | 457(86,6)       |                |
| Greece                  | 146(44,1)            | 185(55,9)       |                | 74(22,4)          | 257(77,6)       |                |
| Croatia                 | 197(41,0)            | 284(59,0)       |                | 269(55,9)         | 212(44,1)       |                |
| The Netherlands         | 81(24,1)             | 255(75,9)       |                | 69(20,5)          | 267(79,5)       |                |
| Spain                   | 112(22,7)            | 381(77,3)       |                | 92(18,7)          | 401(81,3)       |                |
| Level of education+     |                      |                 | <0.001***      |                   |                 | 0.017*         |
| Primary or less         | 206(35,0)            | 382(65,0)       |                | 142(24,1)         | 446(75,9)       |                |
| Secondary or equivalent | 371(27,2)            | 991(72,8)       |                | 387(28,4)         | 975(71,6)       |                |
| Tertiary or higher      | 38(19,7)             | 155(80,3)       |                | 39(20,2)          | 154(79,8)       |                |
| Living situation+       |                      |                 | <0.001***      |                   |                 | 0.060          |
| Living alone            | 311(23,2)            | 1029(76,8)      |                | 335(25,0)         | 1005(75,0)      |                |
| Living with others      | 314(38,2)            | 509(61,8)       |                | 236(28,7)         | 587(71,3)       |                |
| Alcohol risk+           |                      |                 | 0.005**        |                   |                 | 0.002**        |
| No                      | 459(30,2)            | 1063(69,8)      |                | 424(27,9)         | 1098(72,1)      |                |
| Yes                     | 129(23,8)            | 414(76,2)       |                | 115(21,2)         | 428(78,8)       |                |
| Physical activity+      |                      |                 | <0.001***      |                   |                 | <0.001***      |
| < once a week           | 361(23,4)            | 1184(76,6)      |                | 333(21,6)         | 1212(78,4)      |                |
| ≥ once a week           | 259(42,5)            | 351(57,5)       |                | 237(38,9)         | 373(61,1)       |                |
| Smoking <sup>†</sup>    |                      |                 | 0.395          |                   |                 | 0.947          |
| No                      | 575(28,6)            | 1432(71,4)      |                | 532(26,5)         | 1475(73,5)      |                |
| Yes                     | 50(31,8)             | 107(68,2)       |                | 42(26,8)          | 115(73,2)       |                |
| Multi-morbidity+        |                      |                 | <0.001***      |                   |                 | 0.087          |
| No                      | 33(16,8)             | 164(83,2)       |                | 42(21,3)          | 155(78,7)       |                |
| Yes                     | 592(30,1)            | 1378(69,9)      |                | 531(27,0)         | 1439(73,0)      |                |

SD=standard deviation

+Missing items: Level of education =26; Living situation=6; Lifestyle-Alcohol=104; Lifestyle-Exercise=14; Lifestyle-Smoking=5; Multi-morbidity=2

\*p<0.05, \*\*p<0.01, \*\*\*p<0.001, P-values are based on Independent T test for participants who are not lonely and participants who are lonely

**Table S2.** Standardized (full) models of the association between loneliness and Health-Related Quality of Life.

|                                            | PCS-12   |        |       | MCS-12   |        |       |
|--------------------------------------------|----------|--------|-------|----------|--------|-------|
|                                            | Std-β    | 95%-CI |       | Std-β    | 95%-CI |       |
|                                            |          | lower  | upper |          | lower  | upper |
| <b>Loneliness</b> ( <i>Yes versus No</i> ) |          |        |       |          |        |       |
| Emotional loneliness                       | -1,39*** | -1,88  | -0,91 | -3,73*** | -4,16  | -3,31 |
| Social loneliness                          | -0,95*** | -1,44  | -0,45 | -1,84*** | -2,27  | -1,41 |
| <b>Age</b>                                 | -1,49*** | -2,00  | -0,97 | 0,39     | -0,06  | 0,84  |
| <b>Sex</b>                                 |          |        |       |          |        |       |
| Female                                     | -1,23*** | -1,72  | -0,75 | -0,87*** | -1,29  | -0,45 |
| Male ( <i>ref</i> )                        |          |        |       |          |        |       |
| <b>Country</b>                             |          |        |       |          |        |       |
| The United Kingdom                         | -2,09*** | -2,76  | -1,42 | -0,77**  | -1,35  | -0,18 |
| Greece                                     | -0,32    | -0,89  | 0,25  | -0,43    | -0,93  | 0,07  |
| Croatia                                    | -1,89*** | -2,57  | -1,20 | -1,91*** | -2,50  | -1,32 |
| The Netherlands                            | -1,54*** | -2,14  | -0,94 | 0,54*    | 0,02   | 1,07  |
| Spain ( <i>ref</i> )                       |          |        |       |          |        |       |
| <b>Level of education</b>                  |          |        |       |          |        |       |
| Primary or less                            | -0,99*   | -1,80  | -0,19 | -0,87*   | -1,57  | -0,17 |
| Secondary or equivalent                    | 0,09     | -0,69  | 0,87  | -0,58    | -1,26  | 0,10  |
| Tertiary or higher ( <i>ref</i> )          |          |        |       |          |        |       |
| <b>Living situation</b>                    |          |        |       |          |        |       |
| Living alone                               | 0,26     | -0,22  | 0,75  | 0,57**   | 0,15   | 0,99  |
| Living with others ( <i>ref</i> )          |          |        |       |          |        |       |
| <b>Alcohol risk</b>                        |          |        |       |          |        |       |
| No ( <i>ref</i> )                          |          |        |       |          |        |       |
| Yes                                        | 0,87***  | 0,41   | 1,32  | 0,49*    | 0,09   | 0,88  |
| <b>Physical activity</b>                   |          |        |       |          |        |       |
| < once a week                              | -4,02*** | -4,48  | -3,55 | -1,75*** | -2,16  | -1,34 |
| ≥ once a week ( <i>ref</i> )               |          |        |       |          |        |       |
| <b>Smoking</b>                             |          |        |       |          |        |       |
| No ( <i>ref</i> )                          |          |        |       |          |        |       |
| Yes                                        | 0,13     | -0,32  | 0,59  | -0,10    | -0,49  | 0,30  |
| <b>Multi-morbidity</b>                     |          |        |       |          |        |       |
| No ( <i>ref</i> )                          |          |        |       |          |        |       |
| Yes                                        | -1,74*** | -2,20  | -1,29 | -0,13    | -0,53  | 0,26  |
| Adjusted R square, %                       | 31.0     |        |       | 33.9     |        |       |

PCS-12=12-item Physical Component Summary, with higher scores indicating higher levels of health

MCS-12=12-item Mental Component Summary, with higher scores indicating higher levels of health

Std-β=standardized beta

ref=reference category

\* P≤0.05, \*\* P≤0.01, \*\*\* P≤0.001, P-values are based on standardized multivariable linear regression models.

**Table S3** *P*-values for interactions between socio-demographic variables and loneliness on PCS-12 and MCS-12

|                                         | <b>PCS-12</b>         | <b>MCS-12</b>         |
|-----------------------------------------|-----------------------|-----------------------|
|                                         | <b><i>P</i>-value</b> | <b><i>P</i>-value</b> |
| loneliness*age                          | 0.093                 | 0.545                 |
| loneliness*sex                          | 0.069                 | 0.009                 |
| loneliness*country                      | 0.156                 | 0.091                 |
| loneliness*level of education           | 0.066                 | 0.087                 |
| loneliness*living situation             | 0.243                 | 0.874                 |
| emotional loneliness*age                | 0.750                 | 0.728                 |
| emotional loneliness*sex                | 0.419                 | 0.222                 |
| emotional loneliness*country            | 0.000*                | 0.000*                |
| emotional loneliness*level of education | 0.078                 | 0.182                 |
| emotional loneliness*living situation   | 0.919                 | 0.090                 |
| social loneliness*age                   | 0.994                 | 0.700                 |
| social loneliness*sex                   | 0.225                 | 0.020                 |
| social loneliness*country               | 0.020                 | 0.320                 |
| social loneliness*level of education    | 0.710                 | 0.564                 |
| social loneliness*living situation      | 0.352                 | 0.991                 |

PCS-12=12-item Physical Component Summary, with higher scores indicating higher levels of health

MCS-12=12-item Mental Component Summary, with higher scores indicating higher levels of health

UNIANOVA was adopted for interaction analyses with correction of covariates.

After applying Bonferroni correction for multiple testing, the *P*-value equaled  $P=0.05/30=0.002$ .

\* $p<0.002$

**Table S4.** Association between emotional loneliness and Health-Related Quality of Life stratified by country.

| Items                                          | PCS-12             |          |          |                 |          | MCS-12             |          |          |                 |           |
|------------------------------------------------|--------------------|----------|----------|-----------------|----------|--------------------|----------|----------|-----------------|-----------|
|                                                | The United Kingdom | Greece   | Croatia  | The Netherlands | Spain    | The United Kingdom | Greece   | Croatia  | The Netherlands | Spain     |
| <b>Emotional loneliness</b><br>(Yes versus No) | -3.07*             | -2.37    | -4.59*** | -4.52**         | -2.49*   | -8.60***           | -7.47*** | -7.25*** | -11.46***       | -10.23*** |
| <b>Age</b>                                     | -0.06              | -0.31*   | -0.19    | -0.66***        | -0.25**  | 0.15*              | -0.03    | -0.16    | 0.23*           | 0.05      |
| <b>Sex</b>                                     |                    |          |          |                 |          |                    |          |          |                 |           |
| Female                                         | -1.87*             | 0.02     | -1.51    | -4.66**         | -3.39**  | -1.63*             | -3.11**  | -1.91    | 0.24            | -1.57     |
| Male ( <i>ref</i> )                            |                    |          |          |                 |          |                    |          |          |                 |           |
| <b>Level of education</b>                      |                    |          |          |                 |          |                    |          |          |                 |           |
| Primary or less                                | 0.26               | -2.15    | -5.67*   | 1.66            | -2.18    | -2.22              | -2.57    | -5.84*   | -0.22           | -0.95     |
| Secondary or equivalent                        | -0.82              | 1.39     | -3.08    | 4.66            | 0.38     | -2.06              | 0.24     | -2.71    | 0.12            | -1.11     |
| Tertiary or higher ( <i>ref</i> )              |                    |          |          |                 |          |                    |          |          |                 |           |
| <b>Living situation</b>                        |                    |          |          |                 |          |                    |          |          |                 |           |
| Living alone                                   | -0.60              | -1.35    | 1.48     | 1.80            | 0.94     | 1.71*              | 3.44*    | 1.58     | 0.29            | -0.27     |
| Living with others ( <i>ref</i> )              |                    |          |          |                 |          |                    |          |          |                 |           |
| <b>Alcohol risk</b>                            |                    |          |          |                 |          |                    |          |          |                 |           |
| No ( <i>ref</i> )                              |                    |          |          |                 |          |                    |          |          |                 |           |
| Yes                                            | 1.66               | 3.97**   | 1.03     | 1.93            | 1.62     | -0.16              | -0.17    | 1.72     | 0.87            | 3.48**    |
| <b>Physical activity</b>                       |                    |          |          |                 |          |                    |          |          |                 |           |
| < once a week                                  | -12.67***          | -9.18*** | -8.79*** | -5.56***        | -7.11*** | -2.19**            | -2.70*   | -7.66*** | -2.13           | -5.34***  |
| ≥ once a week ( <i>ref</i> )                   |                    |          |          |                 |          |                    |          |          |                 |           |
| <b>Smoking</b>                                 |                    |          |          |                 |          |                    |          |          |                 |           |
| No ( <i>ref</i> )                              |                    |          |          |                 |          |                    |          |          |                 |           |
| Yes                                            | 2.04               | 2.61     | 0.13     | -1.25           | -1.80    | 0.38               | -1.00    | 0.87     | -0.61           | -1.32     |
| <b>Multi-morbidity</b>                         |                    |          |          |                 |          |                    |          |          |                 |           |
| No ( <i>ref</i> )                              |                    |          |          |                 |          |                    |          |          |                 |           |
| Yes                                            | -6.37              | -6.06**  | -7.23*** | -4.72**         | -5.13**  | 0.48               | -0.61    | -2.05    | -1.18           | 0.29      |
| Adjusted R square. %                           | 31.5               | 33.1     | 34.5     | 26.8            | 18.7     | 17.4               | 29.4     | 35.9     | 25.8            | 24.8      |

MCS-12=12-item Mental Component Summary, with higher scores indicating higher levels of health  
ref=reference category

\* P≤0.05, \*\* P≤0.01, \*\*\* P≤0.001, P-values are based on multivariable linear regression models.
